# Supplementary material
Source: publisher figshare collection journal article supplement (https://gsajournals.figshare.com/ndownloader/files/38912712)
Supplement: Supplementary file 1 [file 38912712]

## Sheet: Supplementary Table S2
Table S2. Oxford Nanopore Technologies whole genome shotgun sequence reads used in the DM1S1 assembly
Library Name	All Pass Reads		Pass Reads >= 10 kb
	Total Reads	Total bp	Total Reads	Total bp	Coverage
Thilani_DM1S1_1	504489	6680459296	193971	5494543772	6.5
TJ_DM1S1_2	272664	4742507400	146199	4210279711	5
TJ_DM1S1_3	532584	6256119469	198490	4905149567	5.8
TJ_DM1S1_4	297107	3597062289	101002	2911730745	3.4
TJ_DM1S1_4_20200129	137350	2543323192	70885	2267257481	2.7
TJ_DM1S1_6	138443	1984557563	59291	1676560040	2
TJ_DM1S1_7	197377	2459062919	70470	2018281272	2.4
TJ_DM1S1_8	347598	5341017860	156621	4597630824	5.4
TJ_DM1S1_9	269294	6151084975	190261	5826391852	6.9
TJ_DM1S1_10	177191	4073324642	121156	3869807747	4.6
TJ_DM1S1_11	303500	6510119849	193451	6122340314	7.2
Total	3177597	50338639454	1501797	43899973325	51.9
